# Supplementary material for: Indirect Voltammetry Detection of Non-Electroactive Neurotransmitters using Glassy Carbon Microelectrodes: The Case of Glutamate
Source: Preprints.org preprint supplement (doi:10.20944/preprints202405.0577.v1), 2024-05-09
Supplement: Supplementary file 1 [file supplementary]

# Indirect Voltammetry Detection of Non-Electroactive Neurotransmitters using Glassy Carbon Microelectrodes: The Case of Glutamate

Sandra Lara Galindo<sup>a,b</sup>, Surabhi Nimbalkar<sup>a,b</sup>, Alexis Oyawale<sup>a,b</sup>, James Bunnell<sup>a,b</sup>, Omar Nunez Cuacuas<sup>a,b</sup>, Rhea Montgomery-Welsh<sup>a,b</sup>, Amish Rohatgi<sup>a,b</sup>, Brinda Kodira Cariappa<sup>a,b</sup>, Abhivyakti Gautam<sup>a,b</sup>, Kevin Peguero-Garcia<sup>a,b</sup>, Juyeon Lee<sup>a,b</sup>, Stephanie Ingemann Bisgaard<sup>c</sup>, Carter Faucher<sup>a,b</sup>, Stephan Sylvest Keller<sup>c</sup>, and Sam Kassegne<sup>a,b,1</sup>

<sup>a</sup> NanoFAB.SDSU Research Lab., Department of Mechanical Engineering, College of Engineering, San Diego State University, 5500 Campanile Drive, San Diego, CA 92182-1323, USA

<sup>b</sup> NSF-ERC Center for Neurotechnology (CNT)

<sup>c</sup> National Centre for Nano Fabrication and Characterization, DTU Nanolab, Technical University of Denmark, Ørstedes Plads, Building 347, 2800 Kongens Lyngby, Denmark

## Section S1

Agarose hydrogels of varying concentrations were prepared and loaded by a rectangular weight cell of 50 kg load in a direct compression test using a TA.XT plusC Texture Analyzer (TA) (Stable Micro Systems Products) shown in Figure 1. This test, similar to a method reported for testing of microneedles [53], helped to determine the concentration of agarose resulting in a gel with a Young's modulus comparable to the one of brain tissue [54]. Five different compression tests were performed with a speed of loading of 2 mm/sec.

## Section S2

Figure S1 summarizes the outcome of the compression tests that allowed the determination of concentration of agarose in the hydrogel for it to serve as *in vitro* brain model. The recorded force-time curves (Figure S1a) were converted into strain-stress plots (Figure S1b), where the slope during the initial compression phase was used to extract the modulus of the gel. An agarose hydrogel concentration of 0.6% was found to offer a mean modulus of 5.04 kPa corresponding the modulus of brain tissue [55-56]. In an earlier study, agarose gel concentration of 1.5% has been shown to be a good model for skin [53,56].

---

<sup>1</sup> Address correspondences to Sam Kassegne • Professor of Mechanical Engineering, NanoFAB.SDSU Research Lab, Department of Mechanical Engineering, College of Engineering, San Diego State University, 5500 Campanile Drive, CA 92182-1323. E-mail: [kassegne@sdsu.edu](mailto:kassegne@sdsu.edu) • Tel: (760) 402-7162.

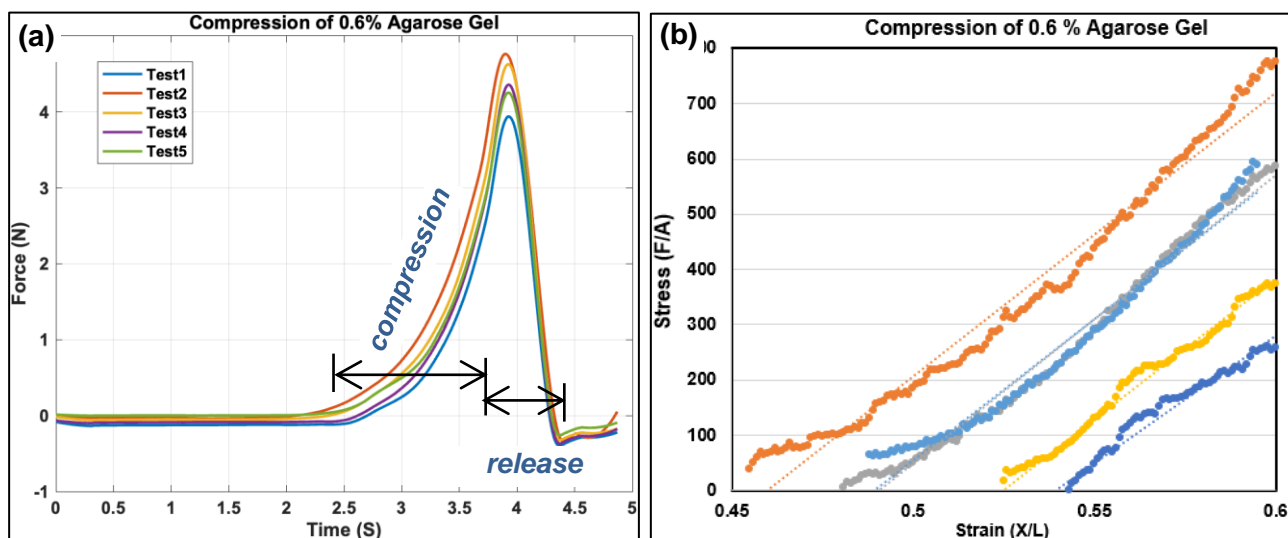

**Figure S1.** Compression test plot for (a) force-time and (b) close-up stress-strain curve for 0.6% agarose hydrogel model.

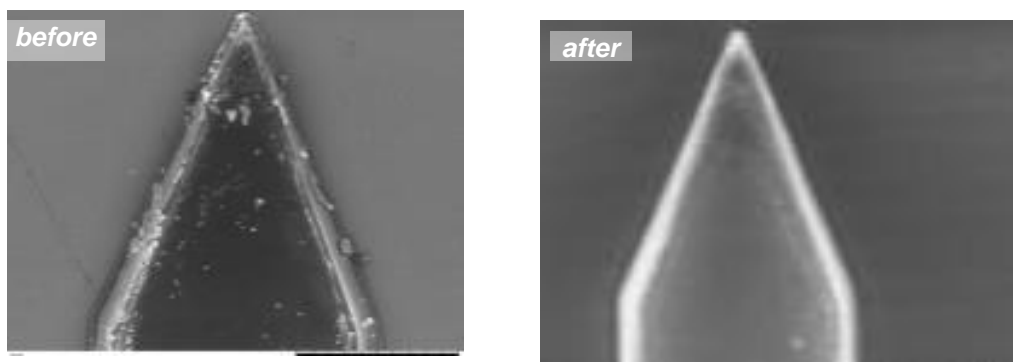

**Figure S2.** Tips before and after penetration tests.

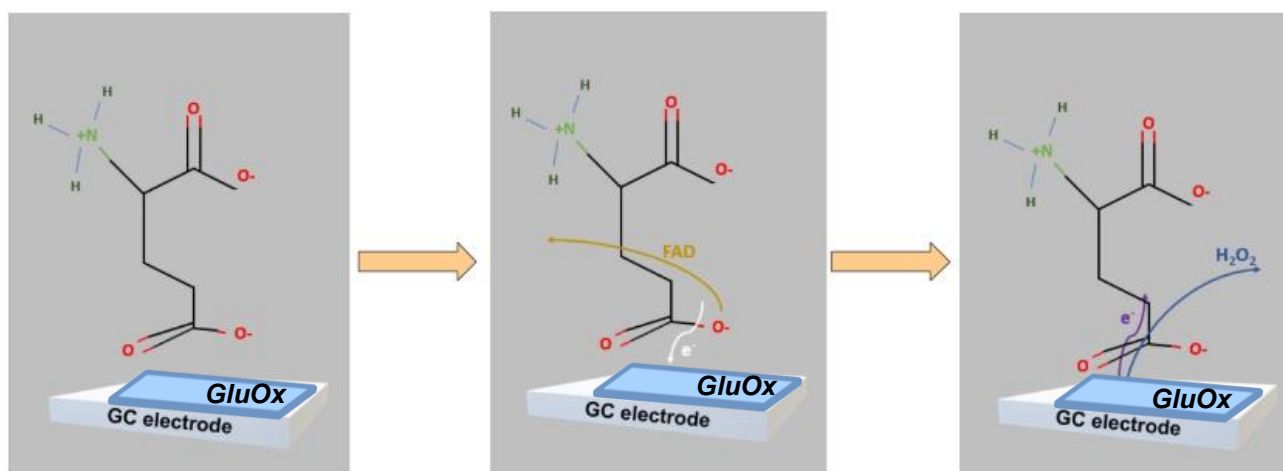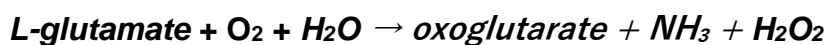

**Figure S3.** Reactions driving FSCV detection on GluOx functionalized GC microelectrode.

| Active Site Amino Acids of Glutamate Oxidase (GluOx) |                      |                 |                          |                 |
|------------------------------------------------------|----------------------|-----------------|--------------------------|-----------------|
| Amino Acid                                           | Chemical Formula     | Number of Atoms | Functional Group         | Property        |
| <b>Tyr</b>                                           | $C_9H_{11}NO_3$      | 24              | Carbon Ring              | Hydrophobic     |
| <b>Arg</b>                                           | $C_6H_{14}N_4O_2$    | 26              | $NH_4$                   | Positive Charge |
| <b>Trp</b>                                           | $C_{11}H_{12}N_2O_2$ | 27              | Carbon Ring              | Hydrophobic     |
| <b>Ala</b>                                           | $C_3H_7NO_2$         | 13              | Carbon Strand ( $CH_3$ ) | Flexible Linker |
| <b>Glu</b>                                           | $C_5H_9NO_4$         | 19              | Carboxylic Acid          | Negative Charge |
| <b>Asp</b>                                           | $C_4H_7NO_4$         | 16              | Carboxylic Acid          | Negative Charge |
| <b>His</b>                                           | $C_6H_9N_3O_2$       | 20              | Amino-Ring               | Positive Charge |

**Table S1.** Active Site Amino Acids of Glutamate Oxidase (GluOX).

| Time   | Concentration                         |
|--------|---------------------------------------|
| 10 sec | 10 nM                                 |
| 1 min  | 30 nM                                 |
| 2 mins | 90 nM                                 |
| 3 mins | 200 nM                                |
| 5 mins | 400 nM                                |
| 6 mins | 800 nM (1000 $\mu$ M for $H_2O_2$ )   |
| 8 mins | 1.6 $\mu$ M (2 $\mu$ M for $H_2O_2$ ) |

**Table S2.** Injection of *glutamate* and  $H_2O_2$  as a function of time with sufficient time provided in-between each step to allow for stabilization of FSCV data collection.
